# Supplementary material for: The influence of polydopamine coating on gold nanorods for laser desorption/ionization time-of-flight mass spectrometric analysis
Source: Royal Society of Chemistry journal article supplement (doi:10.1039/c7an00356k), 2017-01-01
Supplement: c7an00356k1.pdf [file c7an00356k1.pdf]

## Supporting Information

### The influence of polydopamine coating on gold nanorods for laser desorption/ionization time-of-flight mass spectrometric analysis

*Kyungtae Kang,<sup>b</sup> Hongje Jang<sup>c</sup> and Young-Kwan Kim<sup>a\*</sup>*

<sup>a</sup>Carbon Composite Materials Research Center, Institute of Advanced Composite Materials, Korea  
Institute of Science and Technolgy, San 101, Eunha-ri, Bongdong-eup, Wanju-gun, Jeollabuk-do, 565-  
905 Korea

<sup>b</sup>Department of Applied Chemistry, Kyung Hee University, Yongin, Gyeonggi 446-701, South Korea

<sup>c</sup>Department of Chemistry, Kwangwoon University, 20, Gwangwoon-ro, Nowon-gu, Seoul 139-701,  
Korea

\*Corresponding author.

Dr. Young-Kwan Kim, Tel: +82-63-219-8172, Fax: +82-63-219-8239, E-mail: [youngkwan@kist.re.kr](mailto:youngkwan@kist.re.kr)

## Supporting figure

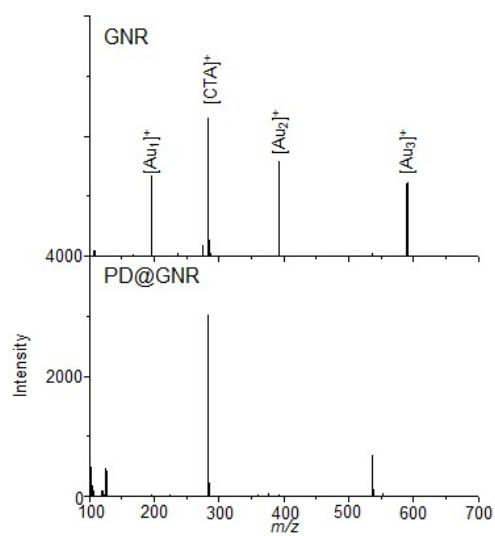

**Figure S1.** Mass spectra of gold nanorod (GNR) and polydoppamine coated GNR (PD@GNR) by laser desorption/ionization time-of-flight mass spectrometry (LDI-ToF-MS) analysis. The applied laser energy was 38  $\mu$ J.

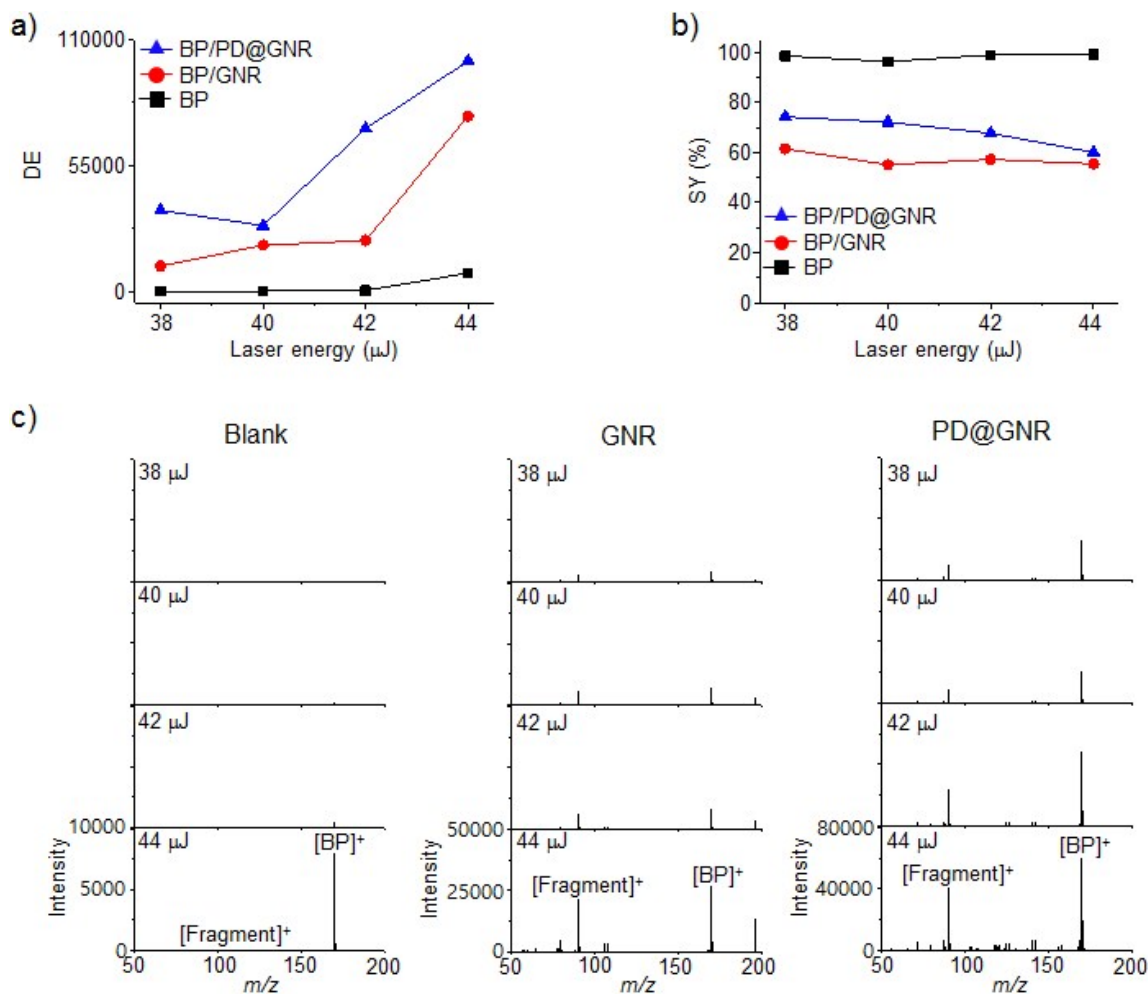

**Figure S2.** a) The DE and (b) SY values of BP itself and those obtained with GNR and PD@GNR as a function of the applied laser power. c) Mass spectra of BP itself and those obtained with GNR and PD@GNR with varying laser power (38 – 44  $\mu\text{J}$ ). The DE value of BP with PD@GNR was higher than that of GNR but the SY value of BP with GNR was lower than that with PD@GNR. This result further confirms BP was softly desorbed and ionized with PD@GNR compared to GNR.

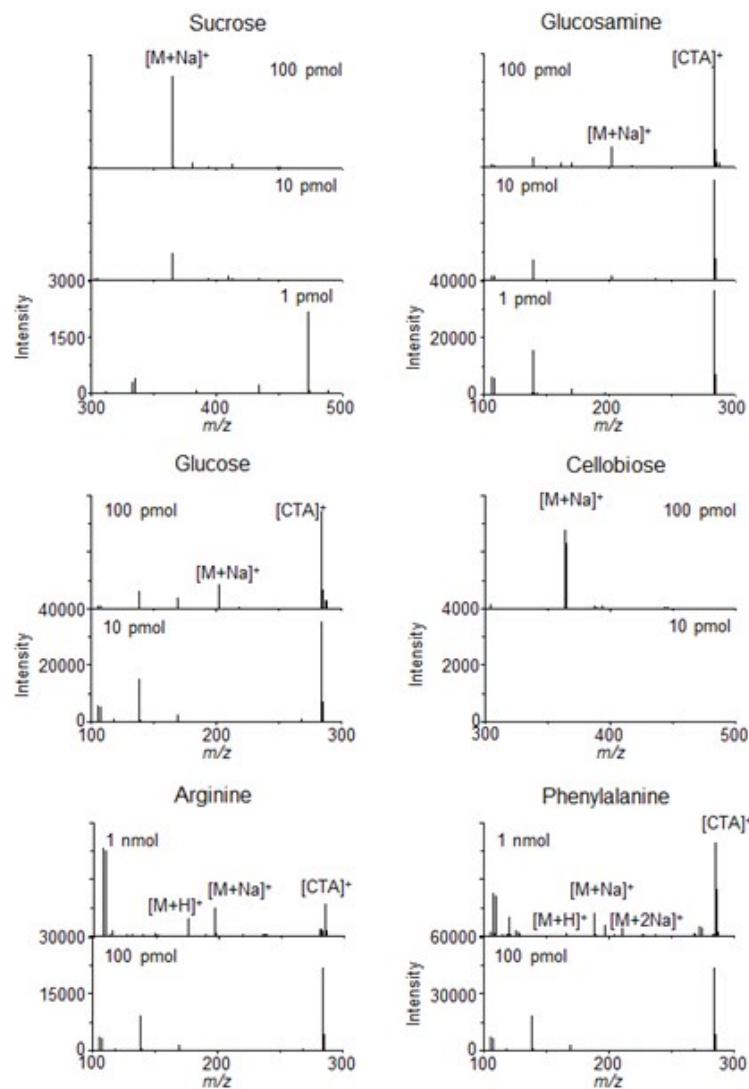

**Figure S3.** Detectable concentration ranges of small molecules such as glucose, glucosamine, sucrose, arginine, phenylalanine and cellobiose obtained by laser desorption/ionization time-of-flight mass spectrometry (LDI-ToF-MS) analysis with assistance of PD@GNR. The laser energy was 44  $\mu$ J.

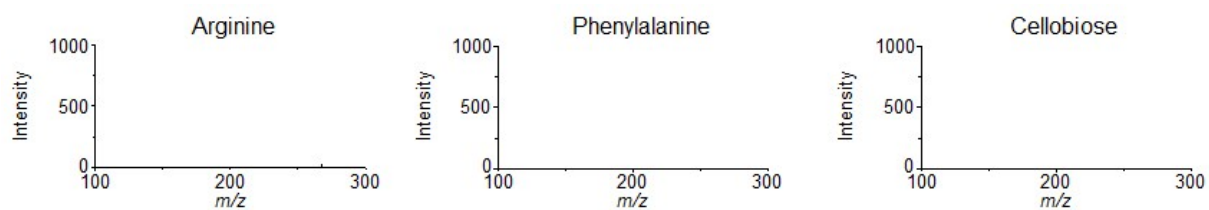

**Figure S4.** Mass spectra of arginine, phenylalanine and cellobiose obtained from blank targets by laser desorption/ionization time-of-flight mass spectrometry (LDI-ToF-MS) analysis without GNR and PD@GNR. The laser energy was 44  $\mu$ J.

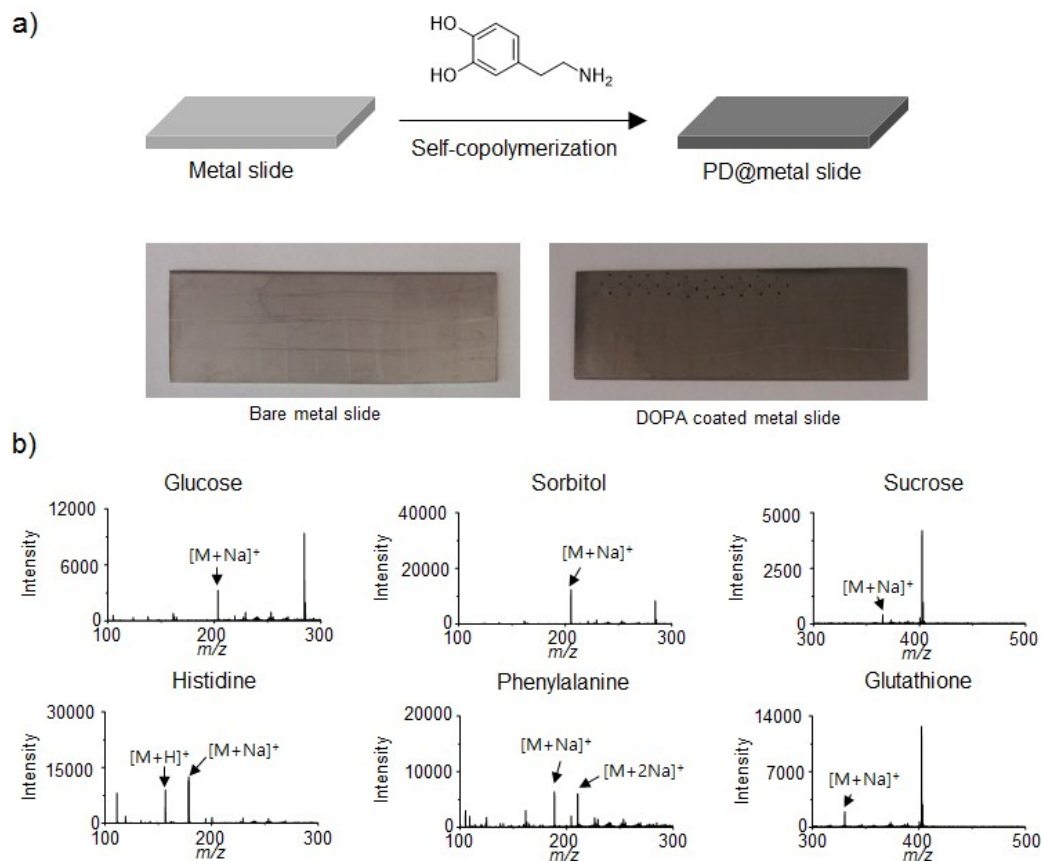

**Figure S5.** a) Schematic diagram of polydopamine (PD) coating on a metal slide. b) Photographs of bare and PD coated metal slides. c) Mass spectra of small molecules obtained on the PD coated metal slide. No mass signal was detected on the bare metal slide. The laser energy was 44  $\mu\text{J}$ . Small molecules were detected as cationic adducts with proton and sodium at  $m/z$  202 [glucose+Na]<sup>+</sup>, 205 [sorbitol+Na]<sup>+</sup>, 364 [sucrose+Na]<sup>+</sup>, 156 [histidine+H]<sup>+</sup> and 177 [histidine+Na]<sup>+</sup>, 188 [phenylalanine+Na]<sup>+</sup> and 210 [phenylalanine+2Na]<sup>+</sup>, and 329 [glutathione+Na]<sup>+</sup>.

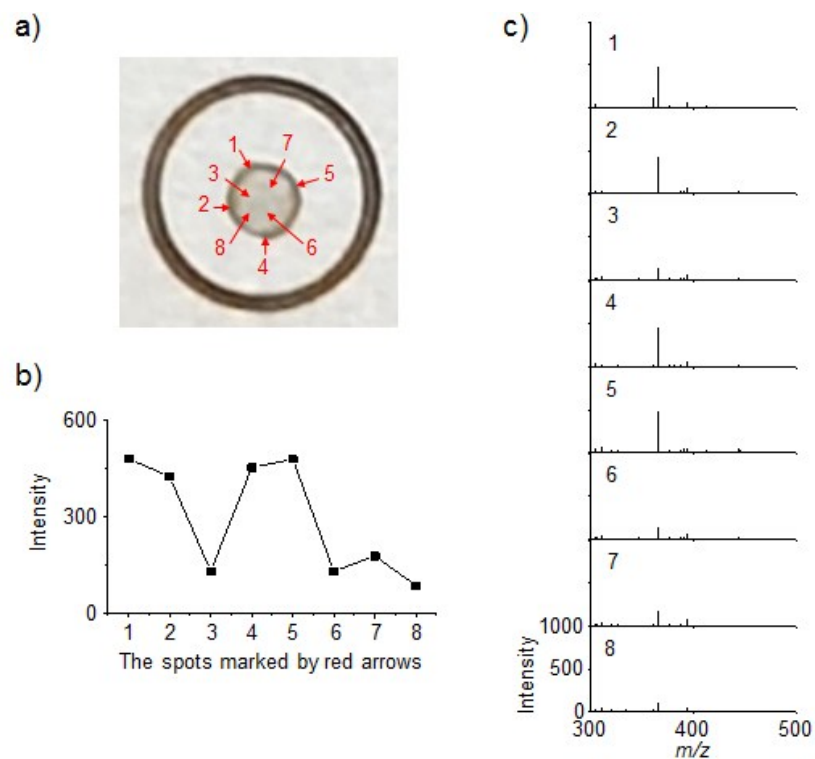

**Figure S6.** a) Photograph of the dried spot of cellobiose and PD@GNR mixture with designated by red arrows that indicated the laser irradiated positions. b) The LDI-ToF-MS mass signal intensities and mass spectra (c) of cellobiose obtained with PD@GNR at the designated region by red arrows. The applied laser energy power was 44  $\mu$ J.

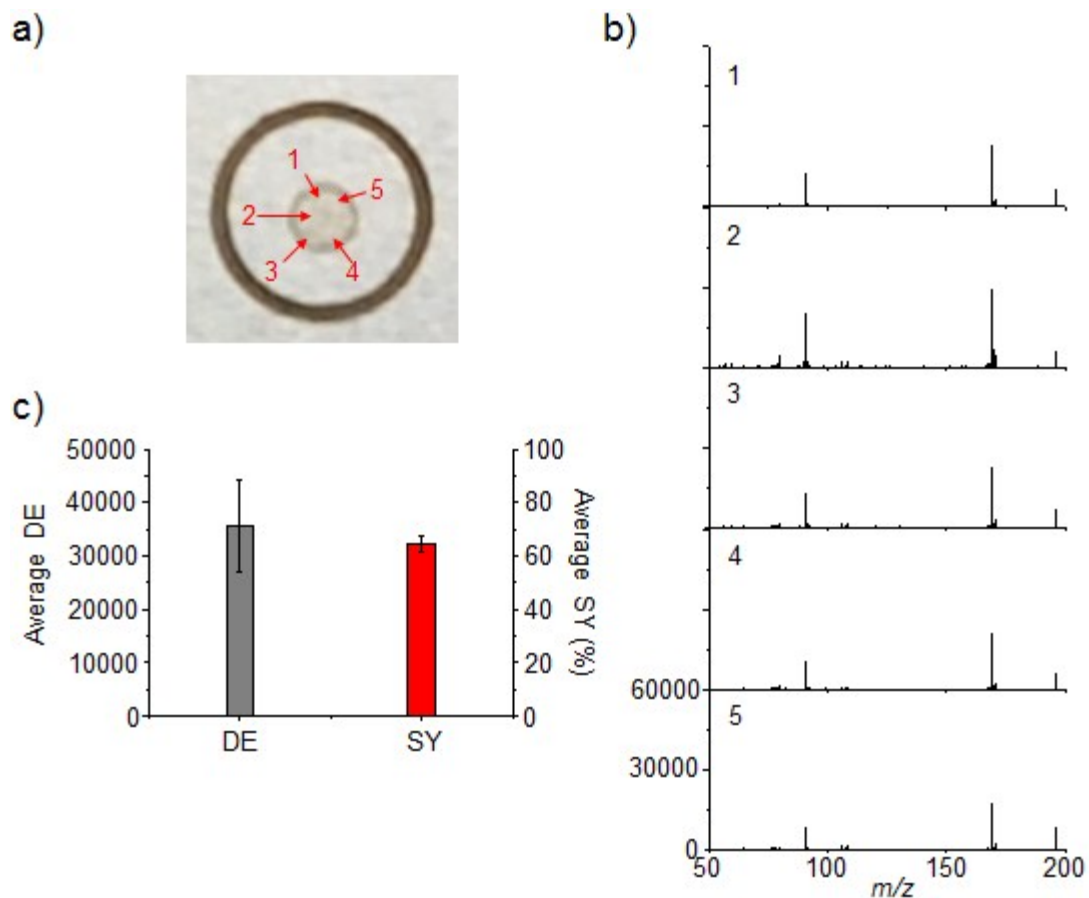

**Figure S7.** a) Photograph of the dried spot of BP and GNR mixture with designated by red arrows that indicated the laser irradiated positions. b) The LDI-ToF-MS mass signal intensities and mass spectra (c) of BP obtained with GNR at the designated region by red arrows. The applied laser energy power was 44  $\mu$ J.



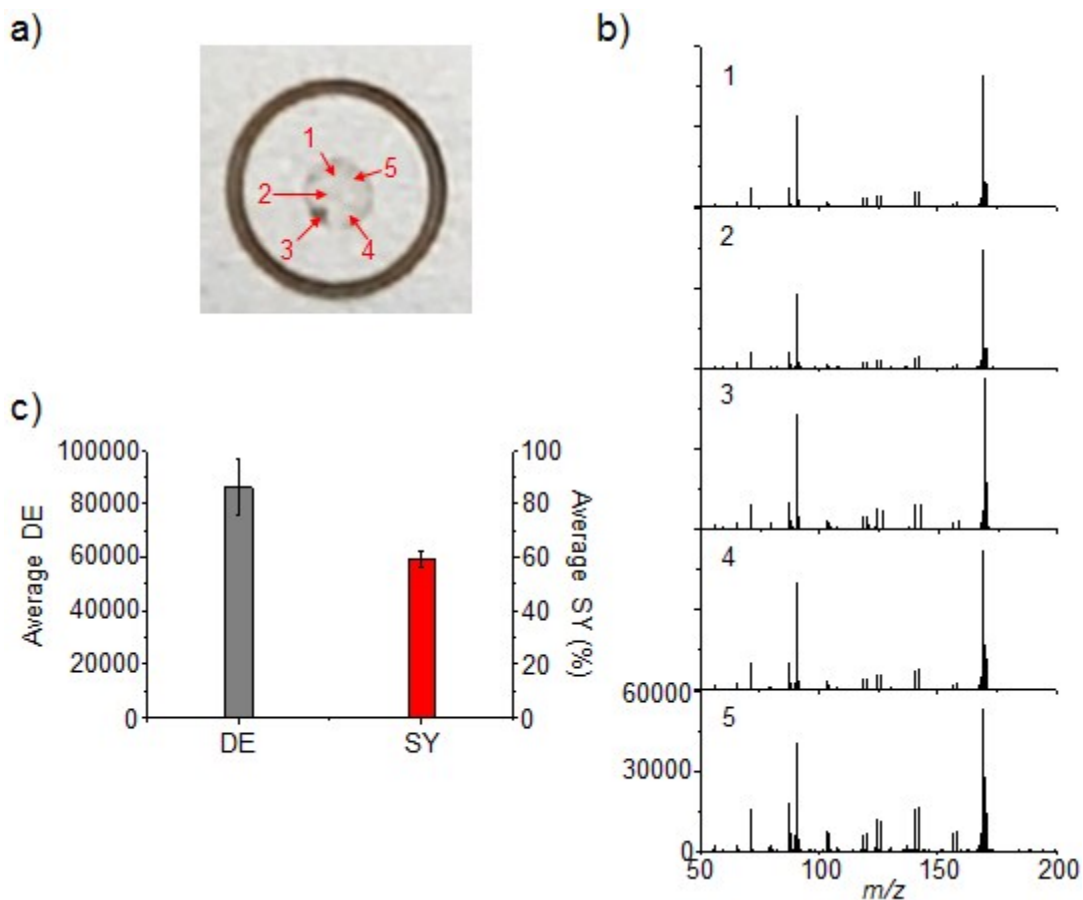

**Figure S8.** a) Photograph of the dried spot of BP and PD@GNR mixture with designated by red arrows that indicated the laser irradiated positions. b) The LDI-ToF-MS mass signal intensities and mass spectra (c) of BP obtained with PD@GNR at the designated region by red arrows. The applied laser energy power was 44  $\mu$ J.

|                             | Repeating unit | By LDI-ToF-MS |      |      |       |            | By gel-permeation chromatography (GPC) |      |      |
|-----------------------------|----------------|---------------|------|------|-------|------------|----------------------------------------|------|------|
|                             |                | Mn            | Mw   | PD   | S/N   | Resolution | Mn                                     | Mw   | PD   |
| PEG <sub>500</sub>          | 44             | 599           | 617  | 1.03 | 56.5  | 2654       | 550                                    | 580  | 1.06 |
| PEG <sub>500</sub> /GNR     |                | 612           | 630  | 1.02 | 244.2 | 4078       |                                        |      |      |
| PEG <sub>500</sub> /PD@GNR  |                | 612           | 635  | 1.03 | 363.5 | 2749       |                                        |      |      |
| PEG <sub>1000</sub>         | 44             | 959           | 993  | 1.03 | 55.0  | 3000       | 900                                    | 940  | 1.05 |
| PEG <sub>1000</sub> /GNR    |                | 934           | 976  | 1.04 | 53.7  | 2845       |                                        |      |      |
| PEG <sub>1000</sub> /PD@GNR |                | 967           | 1002 | 1.03 | 90.0  | 3027       |                                        |      |      |
| PEG <sub>2000</sub>         | 44             | 1997          | 2003 | 1.00 | 4.0   | 6032       | 1900                                   | 1960 | 1.03 |
| PEG <sub>2000</sub> /GNR    |                | 1951          | 1956 | 1.00 | 4.8   | 4876       |                                        |      |      |
| PEG <sub>2000</sub> /PD@GNR |                | 1950          | 1974 | 1.01 | 46.4  | 4230       |                                        |      |      |
| PEG <sub>4000</sub>         | 44             | -             | -    | -    | -     | -          | 4120                                   | 4240 | 1.03 |
| PEG <sub>4000</sub> /GNR    |                | -             | -    | -    | -     | -          |                                        |      |      |
| PEG <sub>4000</sub> /PD@GNR |                | 3965          | 3993 | 1.00 | 12.5  | 2010       |                                        |      |      |

**Figure S9.** The figures of merit (FOM) such as  $M_n$ ,  $M_w$ , polydispersity (PD), signal to noise ratio (S/N) and resolution from the LDI-ToF-MS analysis of PEG itself, and with GNR and PD@GNR. The values of  $M_n$  and  $M_w$  obtained by our strategy were slightly higher than those by using gel-permeation chromatography (GPC) from the supplier information. The PD values obtained by our strategy were slightly lower than those by GPC from supplier information. The slight deviation might be originated from the methodological difference. Importantly, the S/N values of PEG derivatives increased in order of PEG itself, PEG/GNR and PEG/PD@GNR. This result also suggested that the PD coating layer improves the LDI-ToF-MS analysis and our strategy is suitable for the analysis of synthetic polymers.

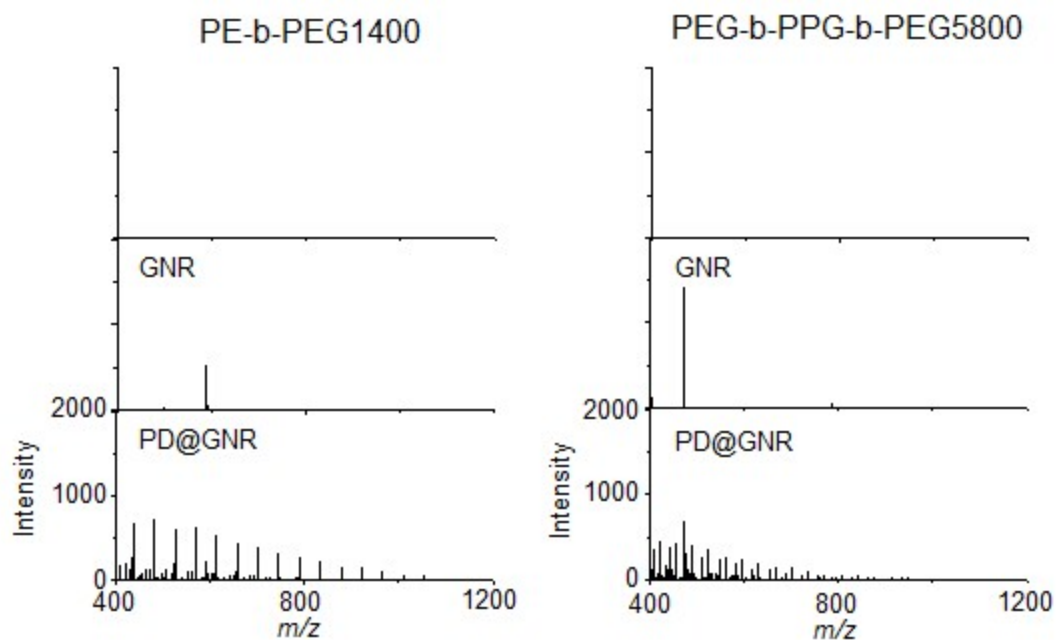

**Figure S10.** LDI-TOF-MS spectra of PE-*b*-PEG<sub>1500</sub> and PEG-*b*-PPG-*b*-PEG<sub>5800</sub> and their LDI-TOF-MS spectra obtained with GNR and PD@GNR. The applied laser energy was 54  $\mu$ J.
